# Supplementary material
Source: publisher figshare collection journal article supplement (https://gsajournals.figshare.com/ndownloader/files/13722791)
Supplement: Supplementary file 1 [file 13722791]

**Table S1.** **FANTOM5 samples used in analysis of gene expression.**

| **Sample** | **Accession ID** |
| --- | --- |
| **Mouse eyeball development** | |
| Eyeball, embryo E12 | CNhs11016 ctss |
| Eyeball, embryo E14 | CNhs10521 ctss |
| Eyeball, embryo E15 | CNhs10593 ctss |
| Eyeball, embryo E17 | CNhs11023 ctss |
| Eyeball, neonate N00 | CNhs11207 ctss |
| Eyeball, neonate N01 | CNhs11140 ctss |
| Eyeball, neonate N02 | CNhs11205 ctss |
| Eyeball, neonate N16 | CNhs11188 ctss |
| Eyeball, adult | CNhs10484 ctss |
|  |  |
| **Human eye tissues and cells** | |
| Optic nerve, donor 1 | CNhs13449 ctss |
| Retina, adult, pool1 | CNhs10636 ctss |
| Retinal Pigment Epithelial Cells | CNhs10842 ctss |
| Retinal Pigment Epithelial Cells | CNhs11338 ctss |
| Retinal Pigment Epithelial Cells | CNhs12096 ctss |
| Retinal Pigment Epithelial Cells | CNhs12733 ctss |
| Corneal Epithelial Cells, donor1 | CNhs11336 ctss |
| Corneal Epithelial Cells, donor2 | CNhs12094 ctss |
| Corneal Epithelial Cells, donor 3 | CNhs12123 ctss |
| Lens Epithelial Cells, donor 1 | CNhs12342 ctss |
| Lens Epithelial Cells, donor 2 | CNhs12568 ctss |
| Lens Epithelial Cells, donor 3 | CNhs12572 ctss |

Details can be found at fantom.gsc.riken.jp/5/sstar/.
